# Supplementary material
Source: HighWire-hosted journal article supplement (https://casereports.bmj.com/content/2017/bcr-2017-219342)

# Isolated Pulmonary Mucormycosis

Supplementary material

Figure 4: Bronchoscopy : Mass like lesion infiltrating and obstructing the R Upper lobe bronchus

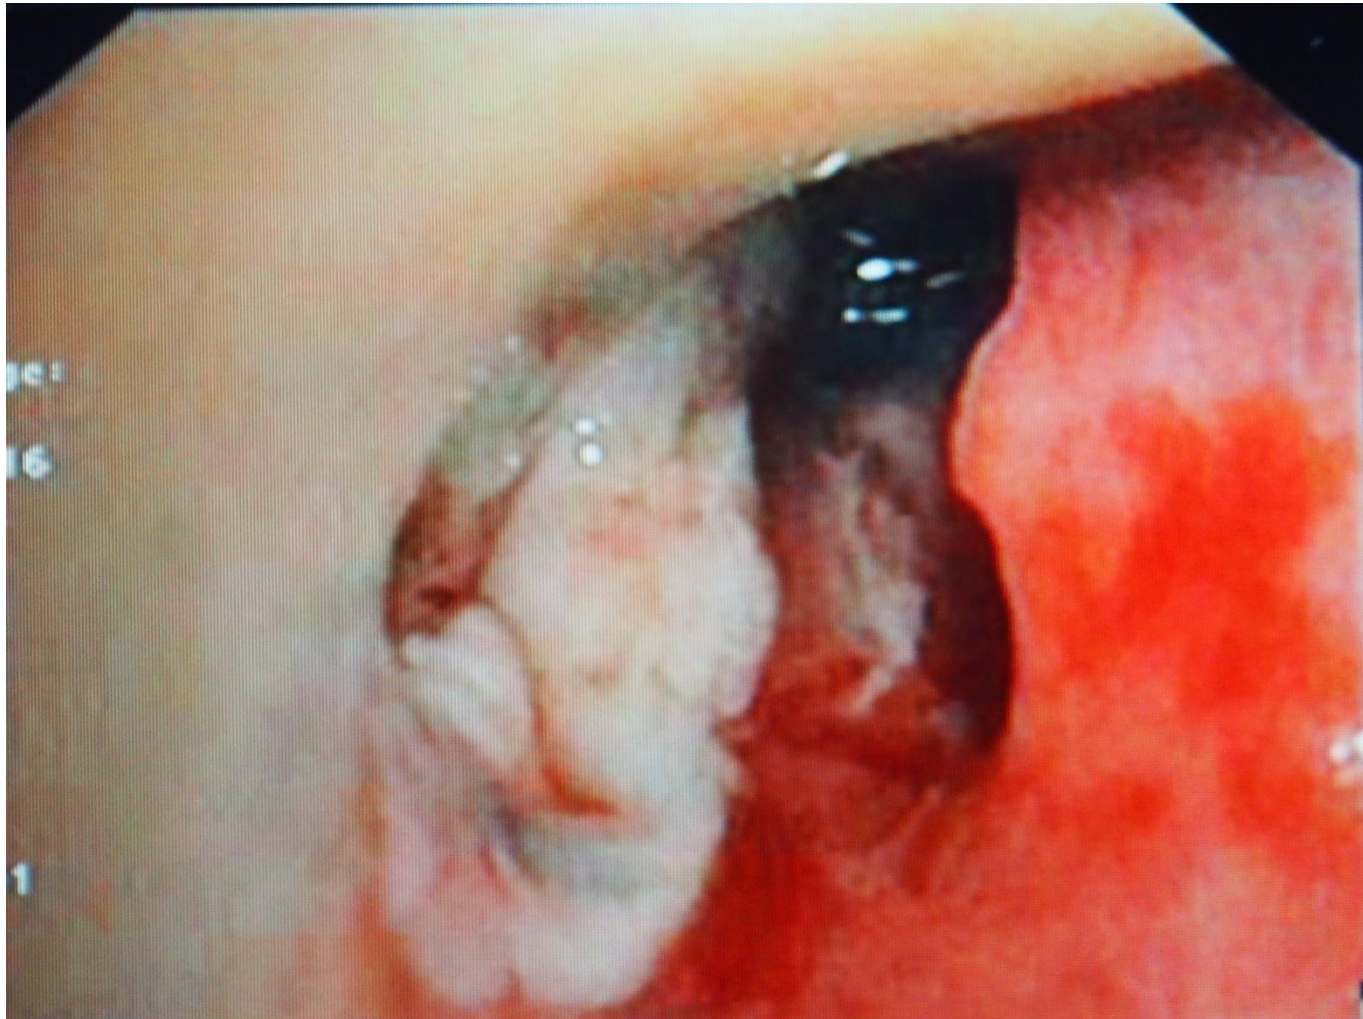

Figure 5 : HE stain of the lung mucosal biopsy shows dense colonies of broad, non-septate as well as irregular branching hyphae -zygomycetes (mucormycosis) group in a necrotic background

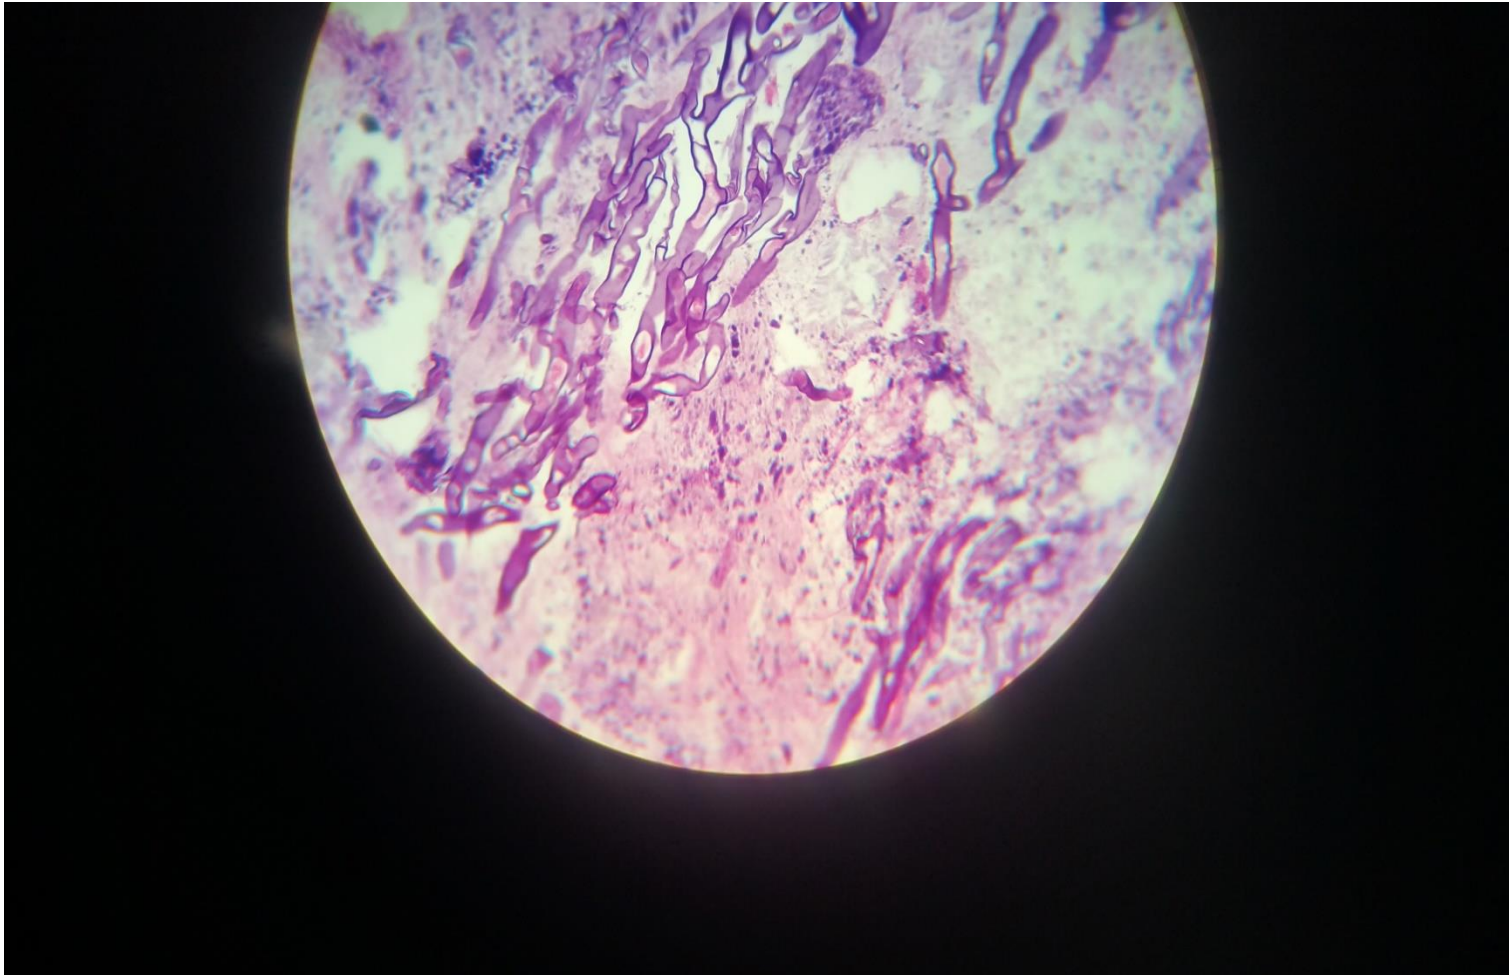

Supplement: inline-supplementary-material-1 [file inline-supplementary-material-1.pdf]
